# Supplementary material for: Electrochemical and theoretical analysis of the reactivity of shikonin derivatives: dissociative electron transfer in esterified compounds
Source: Royal Society of Chemistry journal article supplement (doi:10.1039/c4ob01207k), 2014-06-26
Supplement: c4ob01207k1.pdf [file c4ob01207k1.pdf]

Supplementary Information for

**Electrochemical and Theoretical Analysis of the Reactivity of Shikonin Derivatives: Dissociative Electron Transfer in Esterified Compounds**

By

Georgina Armendáriz-Vidales and Carlos Frontana\*

Centro de Investigación y Desarrollo Tecnológico en Electroquímica, Parque Tecnológico Querétaro Sanfandila, 76703 Sanfandila, Pedro Escobedo, Querétaro. \* Corresponding author: [cfrontana@cideteq.mx](mailto:cfrontana@cideteq.mx), Tel. (52) 442 2116000 Ext. 7849; Fax. (52) 442 2116001

Contents:

Internal coordinates Z-matrices and calculated harmonic frequencies obtained for the minimum energy conformers for the neutral structures of Shikonin derivatives, 1,4-naphthoquinone and 5,8-dihydroxy-1,4-naphthoquinone at the BHandHLYP/6-311++G(2d,2p) level considering solvation by the Marenich, Cramer and Truhlar model in Z-matrices

Internal coordinates Z-matrices and calculated harmonic frequencies obtained for the minimum energy conformers for the neutral structures of Shikonin derivatives, 1,4-naphthoquinone and 5,8-dihydroxy-1,4-naphthoquinone at the BHandHLYP/6-311++G(2d,2p) level considering solvation by the Marenich, Cramer and Truhlar model in Z-matrices

### Shikonin Neutral

| Atom number | Symbol | NA | Bond      | NB | Angle      | NC | Dihedral    |
|-------------|--------|----|-----------|----|------------|----|-------------|
| 1           | C      |    |           |    |            |    |             |
| 2           | C      | 1  | 1.4636611 |    |            |    |             |
| 3           | C      | 2  | 1.4580151 | 1  | 118.516989 |    |             |
| 4           | C      | 3  | 1.4160284 | 2  | 119.545726 | 1  | 0.5023941   |
| 5           | C      | 4  | 1.4593177 | 3  | 120.164772 | 2  | -0.0948625  |
| 6           | C      | 1  | 1.3318876 | 2  | 122.907847 | 3  | 0.2951661   |
| 7           | H      | 1  | 1.0760132 | 6  | 121.149033 | 5  | 178.927896  |
| 8           | C      | 3  | 1.3854939 | 2  | 120.356831 | 1  | -179.45036  |
| 9           | C      | 4  | 1.3872714 | 3  | 119.750357 | 2  | 179.880354  |
| 10          | C      | 9  | 1.404941  | 4  | 119.336412 | 3  | 0.3758299   |
| 11          | C      | 10 | 1.3622446 | 9  | 120.832683 | 4  | -0.3178861  |
| 12          | H      | 10 | 1.0761339 | 9  | 118.438901 | 4  | 179.771665  |
| 13          | H      | 11 | 1.0761389 | 10 | 120.706419 | 9  | -179.949715 |
| 14          | C      | 6  | 1.5088655 | 1  | 122.774274 | 2  | 178.630025  |
| 15          | H      | 14 | 1.0869891 | 6  | 107.932402 | 1  | 138.541703  |
| 16          | C      | 14 | 1.5296913 | 6  | 110.747645 | 1  | -102.481598 |
| 17          | H      | 16 | 1.084441  | 14 | 107.941978 | 6  | 66.0699535  |
| 18          | H      | 16 | 1.0874186 | 14 | 107.80699  | 6  | -49.3345686 |
| 19          | C      | 16 | 1.4969441 | 14 | 112.425593 | 6  | -169.637779 |
| 20          | H      | 19 | 1.0823443 | 16 | 114.367238 | 14 | 55.7552072  |
| 21          | C      | 19 | 1.3297958 | 16 | 128.189015 | 14 | -125.267244 |
| 22          | C      | 21 | 1.5011477 | 19 | 120.792733 | 16 | -178.710081 |
| 23          | H      | 22 | 1.0890192 | 21 | 110.717087 | 19 | -121.674008 |
| 24          | H      | 22 | 1.0850946 | 21 | 111.937147 | 19 | -0.6554584  |
| 25          | H      | 22 | 1.08901   | 21 | 110.718528 | 19 | 120.313782  |
| 26          | C      | 21 | 1.4995113 | 19 | 125.058553 | 16 | 0.8237576   |
| 27          | H      | 26 | 1.0823087 | 21 | 113.501298 | 19 | 0.7886503   |
| 28          | H      | 26 | 1.0887839 | 21 | 110.187694 | 19 | 122.223582  |
| 29          | H      | 26 | 1.0889725 | 21 | 110.185583 | 19 | -120.517803 |
| 30          | O      | 14 | 1.4083067 | 6  | 111.506486 | 1  | 17.4665527  |
| 31          | H      | 30 | 0.9542136 | 14 | 109.292883 | 6  | 73.7736095  |
| 32          | O      | 9  | 1.3326196 | 4  | 123.358189 | 3  | -179.752674 |

|    |   |    |           |   |            |   |             |
|----|---|----|-----------|---|------------|---|-------------|
| 33 | H | 32 | 0.9690552 | 9 | 107.96237  | 4 | 0.5736496   |
| 34 | O | 8  | 1.3330536 | 3 | 123.140019 | 2 | -0.1377409  |
| 35 | H | 34 | 0.9697539 | 8 | 107.882647 | 3 | -0.0153301  |
| 36 | O | 5  | 1.2236392 | 4 | 121.400018 | 3 | 178.57106   |
| 37 | O | 2  | 1.2253583 | 1 | 119.789404 | 6 | -179.440659 |

List of calculated harmonic frequencies for each vibrational normal mode

| Mode | Frequency / cm <sup>-1</sup> |
|------|------------------------------|
| 1    | 23.71                        |
| 2    | 34.56                        |
| 3    | 41.13                        |
| 4    | 64.44                        |
| 5    | 95.19                        |
| 6    | 111.56                       |
| 7    | 112.89                       |
| 8    | 140.34                       |
| 9    | 160.40                       |
| 10   | 173.77                       |
| 11   | 190.52                       |
| 12   | 209.62                       |
| 13   | 214.80                       |
| 14   | 277.11                       |
| 15   | 295.45                       |
| 16   | 302.52                       |
| 17   | 316.93                       |
| 18   | 334.01                       |
| 19   | 381.61                       |
| 20   | 386.34                       |
| 21   | 401.82                       |
| 22   | 431.96                       |
| 23   | 444.32                       |
| 24   | 448.29                       |
| 25   | 477.99                       |
| 26   | 479.61                       |
| 27   | 492.20                       |
| 28   | 502.35                       |
| 29   | 508.34                       |
| 30   | 546.59                       |
| 31   | 569.47                       |
| 32   | 615.48                       |

|    |         |
|----|---------|
| 33 | 658.44  |
| 34 | 716.24  |
| 35 | 721.98  |
| 36 | 736.94  |
| 37 | 741.21  |
| 38 | 744.18  |
| 39 | 770.86  |
| 40 | 813.11  |
| 41 | 820.01  |
| 42 | 837.02  |
| 43 | 873.29  |
| 44 | 896.93  |
| 45 | 940.62  |
| 46 | 953.66  |
| 47 | 981.54  |
| 48 | 996.66  |
| 49 | 998.07  |
| 50 | 1030.31 |
| 51 | 1038.84 |
| 52 | 1051.10 |
| 53 | 1071.37 |
| 54 | 1081.80 |
| 55 | 1123.39 |
| 56 | 1145.39 |
| 57 | 1165.00 |
| 58 | 1189.06 |
| 59 | 1205.19 |
| 60 | 1213.35 |
| 61 | 1250.01 |
| 62 | 1288.87 |
| 63 | 1290.22 |
| 64 | 1331.79 |
| 65 | 1342.67 |
| 66 | 1351.29 |
| 67 | 1364.17 |
| 68 | 1402.22 |
| 69 | 1410.06 |
| 70 | 1421.98 |
| 71 | 1439.78 |
| 72 | 1449.17 |
| 73 | 1458.44 |
| 74 | 1464.91 |
| 75 | 1481.86 |

|     |         |
|-----|---------|
| 76  | 1486.78 |
| 77  | 1504.97 |
| 78  | 1508.90 |
| 79  | 1517.74 |
| 80  | 1522.87 |
| 81  | 1526.96 |
| 82  | 1543.00 |
| 83  | 1565.63 |
| 84  | 1684.12 |
| 85  | 1694.95 |
| 86  | 1740.85 |
| 87  | 1745.06 |
| 88  | 1794.84 |
| 89  | 1801.86 |
| 90  | 3092.45 |
| 91  | 3099.82 |
| 92  | 3130.77 |
| 93  | 3138.48 |
| 94  | 3139.65 |
| 95  | 3141.55 |
| 96  | 3182.91 |
| 97  | 3184.11 |
| 98  | 3203.40 |
| 99  | 3212.34 |
| 100 | 3285.74 |
| 101 | 3293.31 |
| 102 | 3298.44 |
| 103 | 3608.41 |
| 104 | 3621.90 |
| 105 | 3983.54 |

---

## Deoxyshikonin Neutral

| Atom Number | Symbol | NA | Bond      | NB | Angle      | NC | Dihedral    |
|-------------|--------|----|-----------|----|------------|----|-------------|
| 1           | C      |    |           |    |            |    |             |
| 2           | C      | 1  | 1.4622716 |    |            |    |             |
| 3           | C      | 2  | 1.4589269 | 1  | 118.487322 |    |             |
| 4           | C      | 3  | 1.4155547 | 2  | 119.515324 | 1  | 0.4371711   |
| 5           | C      | 4  | 1.4603598 | 3  | 120.154274 | 2  | -0.1217896  |
| 6           | C      | 1  | 1.3342833 | 2  | 123.266808 | 3  | 0.2587884   |
| 7           | H      | 1  | 1.0774818 | 6  | 121.09212  | 5  | 179.125646  |
| 8           | C      | 3  | 1.3855482 | 2  | 120.370463 | 1  | -179.67003  |
| 9           | C      | 4  | 1.387408  | 3  | 119.735836 | 2  | 179.772513  |
| 10          | C      | 9  | 1.4046036 | 4  | 119.347009 | 3  | 0.3134757   |
| 11          | C      | 10 | 1.3625894 | 9  | 120.822592 | 4  | -0.2723584  |
| 12          | H      | 10 | 1.0761355 | 9  | 118.478243 | 4  | 179.770474  |
| 13          | H      | 11 | 1.0761195 | 10 | 120.706252 | 9  | -179.934035 |
| 14          | C      | 6  | 1.4946671 | 1  | 122.838548 | 2  | 178.131307  |
| 15          | H      | 14 | 1.0857763 | 6  | 109.146042 | 1  | 137.312339  |
| 16          | C      | 14 | 1.5387259 | 6  | 112.503408 | 1  | -101.386766 |
| 17          | H      | 16 | 1.0838965 | 14 | 108.951769 | 6  | 61.4516694  |
| 18          | H      | 16 | 1.0877315 | 14 | 108.650654 | 6  | -54.7606327 |
| 19          | C      | 16 | 1.4970706 | 14 | 111.519492 | 6  | -174.819168 |
| 20          | H      | 19 | 1.0823064 | 16 | 114.413982 | 14 | 64.5713339  |
| 21          | C      | 19 | 1.3307095 | 16 | 128.342698 | 14 | -114.76772  |
| 22          | C      | 21 | 1.5012447 | 19 | 120.763185 | 16 | 179.993012  |
| 23          | H      | 22 | 1.0889974 | 21 | 110.753884 | 19 | -121.330543 |
| 24          | H      | 22 | 1.0850199 | 21 | 111.88721  | 19 | -0.2864096  |
| 25          | H      | 22 | 1.0890324 | 21 | 110.683988 | 19 | 120.655412  |
| 26          | C      | 21 | 1.4996061 | 19 | 125.130333 | 16 | -0.3838661  |
| 27          | H      | 26 | 1.0825118 | 21 | 113.548185 | 19 | 1.0214524   |
| 28          | H      | 26 | 1.0887776 | 21 | 110.141117 | 19 | 122.424359  |
| 29          | H      | 26 | 1.0889032 | 21 | 110.174089 | 19 | -120.363939 |
| 30          | O      | 9  | 1.3330588 | 4  | 123.322585 | 3  | -179.773189 |
| 31          | H      | 30 | 0.9693606 | 9  | 107.853805 | 4  | 0.4335127   |
| 32          | O      | 8  | 1.3335228 | 3  | 123.109025 | 2  | -0.0231718  |
| 33          | H      | 32 | 0.9699207 | 8  | 107.788586 | 3  | -0.0960699  |
| 34          | O      | 5  | 1.2230766 | 4  | 121.252892 | 3  | 178.833308  |
| 35          | O      | 2  | 1.2260489 | 1  | 119.911357 | 6  | -179.57524  |
| 36          | H      | 14 | 1.0847144 | 6  | 108.815975 | 1  | 19.7829364  |

List of calculated harmonic frequencies for each vibrational normal mode

| <b>Mode</b> | <b>Frequency / cm<sup>-1</sup></b> |
|-------------|------------------------------------|
| 1           | 31.26                              |
| 2           | 35.35                              |
| 3           | 52.95                              |
| 4           | 74.31                              |
| 5           | 89.73                              |
| 6           | 112.51                             |
| 7           | 129.07                             |
| 8           | 162.69                             |
| 9           | 169.72                             |
| 10          | 187.99                             |
| 11          | 213.25                             |
| 12          | 226.05                             |
| 13          | 254.05                             |
| 14          | 316.02                             |
| 15          | 328.81                             |
| 16          | 349.69                             |
| 17          | 378.65                             |
| 18          | 385.00                             |
| 19          | 403.24                             |
| 20          | 424.86                             |
| 21          | 444.97                             |
| 22          | 445.42                             |
| 23          | 471.68                             |
| 24          | 484.09                             |
| 25          | 500.03                             |
| 26          | 506.18                             |
| 27          | 531.21                             |
| 28          | 557.88                             |
| 29          | 603.55                             |
| 30          | 628.55                             |
| 31          | 701.98                             |
| 32          | 717.10                             |
| 33          | 725.00                             |
| 34          | 740.69                             |
| 35          | 741.63                             |
| 36          | 766.28                             |
| 37          | 774.79                             |
| 38          | 796.86                             |
| 39          | 831.44                             |
| 40          | 846.69                             |
| 41          | 897.39                             |
| 42          | 901.19                             |

|    |         |
|----|---------|
| 43 | 952.67  |
| 44 | 964.55  |
| 45 | 991.22  |
| 46 | 997.29  |
| 47 | 1033.37 |
| 48 | 1039.63 |
| 49 | 1052.03 |
| 50 | 1058.98 |
| 51 | 1077.90 |
| 52 | 1096.02 |
| 53 | 1144.77 |
| 54 | 1165.23 |
| 55 | 1185.04 |
| 56 | 1200.66 |
| 57 | 1227.35 |
| 58 | 1254.59 |
| 59 | 1289.80 |
| 60 | 1292.55 |
| 61 | 1335.55 |
| 62 | 1340.98 |
| 63 | 1353.97 |
| 64 | 1380.16 |
| 65 | 1402.73 |
| 66 | 1408.67 |
| 67 | 1427.18 |
| 68 | 1431.87 |
| 69 | 1455.37 |
| 70 | 1464.96 |
| 71 | 1465.89 |
| 72 | 1480.21 |
| 73 | 1507.26 |
| 74 | 1514.75 |
| 75 | 1520.26 |
| 76 | 1523.45 |
| 77 | 1527.35 |
| 78 | 1542.77 |
| 79 | 1543.68 |
| 80 | 1566.00 |
| 81 | 1684.31 |
| 82 | 1696.10 |
| 83 | 1737.83 |
| 84 | 1744.43 |
| 85 | 1791.77 |



|     |         |
|-----|---------|
| 86  | 1798.07 |
| 87  | 3093.09 |
| 88  | 3100.76 |
| 89  | 3121.84 |
| 90  | 3139.11 |
| 91  | 3140.52 |
| 92  | 3142.73 |
| 93  | 3173.89 |
| 94  | 3184.06 |
| 95  | 3193.12 |
| 96  | 3203.63 |
| 97  | 3211.90 |
| 98  | 3275.23 |
| 99  | 3284.77 |
| 100 | 3297.53 |
| 101 | 3604.12 |
| 102 | 3613.97 |

---

### Isobutyrylshikonin Neutral

| Atom Number | Symbol | NA | Bond      | NB | Angle      | NC | Dihedral    |
|-------------|--------|----|-----------|----|------------|----|-------------|
| 1           | C      |    |           |    |            |    |             |
| 2           | C      | 1  | 1.4650818 |    |            |    |             |
| 3           | C      | 2  | 1.4570875 | 1  | 118.506453 |    |             |
| 4           | C      | 3  | 1.4162363 | 2  | 119.596    | 1  | 0.3530911   |
| 5           | C      | 4  | 1.4580423 | 3  | 120.193303 | 2  | -0.0215221  |
| 6           | C      | 1  | 1.3309216 | 2  | 122.753784 | 3  | -0.0865791  |
| 7           | H      | 1  | 1.0760476 | 6  | 121.63526  | 5  | 179.390233  |
| 8           | C      | 3  | 1.3853951 | 2  | 120.322059 | 1  | -179.598203 |
| 9           | C      | 4  | 1.3872387 | 3  | 119.770034 | 2  | 179.934877  |
| 10          | C      | 9  | 1.405248  | 4  | 119.321471 | 3  | 0.2069975   |
| 11          | C      | 10 | 1.3619549 | 9  | 120.830349 | 4  | -0.1751546  |
| 12          | H      | 10 | 1.0760781 | 9  | 118.438494 | 4  | 179.930208  |
| 13          | H      | 11 | 1.0760777 | 10 | 120.725918 | 9  | -179.911359 |
| 14          | C      | 6  | 1.5043979 | 1  | 123.492393 | 2  | 178.575015  |
| 15          | H      | 14 | 1.0818393 | 6  | 108.686651 | 1  | 139.785152  |
| 16          | C      | 14 | 1.5283896 | 6  | 111.583612 | 1  | -98.9111101 |
| 17          | H      | 16 | 1.0836986 | 14 | 108.426627 | 6  | 64.9847407  |
| 18          | H      | 16 | 1.0873066 | 14 | 107.1205   | 6  | -50.2820971 |
| 19          | C      | 16 | 1.49689   | 14 | 112.265314 | 6  | -170.129533 |
| 20          | H      | 19 | 1.0820229 | 16 | 114.356766 | 14 | 59.4167597  |
| 21          | C      | 19 | 1.3297832 | 16 | 128.096697 | 14 | -121.239565 |
| 22          | C      | 21 | 1.5008787 | 19 | 120.692714 | 16 | -179.138859 |
| 23          | H      | 22 | 1.0888804 | 21 | 110.757201 | 19 | 121.186668  |
| 24          | H      | 22 | 1.0888737 | 21 | 110.57884  | 19 | -120.826479 |
| 25          | H      | 22 | 1.0849445 | 21 | 111.933683 | 19 | 0.148932    |
| 26          | C      | 21 | 1.499297  | 19 | 125.150786 | 16 | 0.7303175   |
| 27          | H      | 26 | 1.0823907 | 21 | 113.60036  | 19 | 2.6036369   |
| 28          | H      | 26 | 1.0886408 | 21 | 110.012925 | 19 | 123.978336  |
| 29          | H      | 26 | 1.0889738 | 21 | 110.177267 | 19 | -118.821626 |
| 30          | O      | 14 | 1.4262609 | 6  | 110.776186 | 1  | 20.1899678  |
| 31          | O      | 9  | 1.3321309 | 4  | 123.399173 | 3  | -179.835618 |
| 32          | H      | 31 | 0.9688083 | 9  | 108.064691 | 4  | 0.3349226   |
| 33          | O      | 8  | 1.3325934 | 3  | 123.15128  | 2  | -0.0611871  |
| 34          | H      | 33 | 0.9696164 | 8  | 107.936491 | 3  | -0.1466975  |
| 35          | O      | 5  | 1.2233727 | 4  | 121.600885 | 3  | 179.244065  |
| 36          | O      | 2  | 1.2249245 | 1  | 119.671217 | 6  | -179.888144 |
| 37          | C      | 30 | 1.3360632 | 14 | 118.606045 | 6  | 84.8390892  |
| 38          | C      | 37 | 1.5071295 | 30 | 111.399087 | 14 | 178.573291  |
| 39          | H      | 38 | 1.0868485 | 37 | 106.396927 | 30 | -44.262902  |
| 40          | O      | 37 | 1.1976333 | 30 | 122.861743 | 14 | -2.0313651  |

|    |   |    |           |    |            |    |             |
|----|---|----|-----------|----|------------|----|-------------|
| 41 | C | 38 | 1.530834  | 37 | 109.561405 | 30 | 72.3304643  |
| 42 | H | 41 | 1.0870193 | 38 | 110.95698  | 37 | 61.3894721  |
| 43 | H | 41 | 1.0855036 | 38 | 109.449466 | 37 | -179.52372  |
| 44 | H | 41 | 1.0846487 | 38 | 111.746513 | 37 | -59.8765352 |
| 45 | C | 38 | 1.5188696 | 37 | 111.294464 | 30 | -163.514321 |
| 46 | H | 45 | 1.0855283 | 38 | 111.550406 | 37 | 57.4578203  |
| 47 | H | 45 | 1.0858802 | 38 | 109.568443 | 37 | 177.165283  |
| 48 | H | 45 | 1.0857639 | 38 | 111.206149 | 37 | -63.3229209 |

List of calculated harmonic frequencies for each vibrational normal mode

| Mode | Frequency / $\text{cm}^{-1}$ |
|------|------------------------------|
| 1    | 19.08                        |
| 2    | 22.19                        |
| 3    | 28.36                        |
| 4    | 330.7                        |
| 5    | 39.34                        |
| 6    | 50.92                        |
| 7    | 67.30                        |
| 8    | 85.02                        |
| 9    | 113.03                       |
| 10   | 125.45                       |
| 11   | 140.43                       |
| 12   | 147.66                       |
| 13   | 159.92                       |
| 14   | 171.18                       |
| 15   | 184.02                       |
| 16   | 200.08                       |
| 17   | 220.18                       |
| 18   | 224.85                       |
| 19   | 240.56                       |
| 20   | 259.05                       |
| 21   | 285.48                       |
| 22   | 297.84                       |
| 23   | 328.76                       |
| 24   | 329.38                       |
| 25   | 337.61                       |
| 26   | 364.52                       |
| 27   | 380.01                       |
| 28   | 387.27                       |
| 29   | 397.02                       |
| 30   | 425.20                       |

|    |         |
|----|---------|
| 31 | 440.06  |
| 32 | 445.37  |
| 33 | 464.62  |
| 34 | 478.35  |
| 35 | 490.14  |
| 36 | 501.84  |
| 37 | 512.86  |
| 38 | 518.61  |
| 39 | 559.60  |
| 40 | 569.95  |
| 41 | 617.12  |
| 42 | 660.01  |
| 43 | 675.32  |
| 44 | 719.53  |
| 45 | 728.40  |
| 46 | 739.80  |
| 47 | 743.72  |
| 48 | 746.70  |
| 49 | 775.68  |
| 50 | 799.91  |
| 51 | 812.30  |
| 52 | 825.08  |
| 53 | 840.56  |
| 54 | 877.95  |
| 55 | 890.56  |
| 56 | 896.18  |
| 57 | 927.84  |
| 58 | 956.20  |
| 59 | 971.12  |
| 60 | 978.06  |
| 61 | 990.06  |
| 62 | 996.57  |
| 63 | 997.24  |
| 64 | 1010.49 |
| 65 | 1037.83 |
| 66 | 1042.72 |
| 67 | 1049.94 |
| 68 | 1080.23 |
| 69 | 1109.41 |
| 70 | 1117.90 |
| 71 | 1142.79 |
| 72 | 1159.47 |
| 73 | 1167.81 |

|     |         |
|-----|---------|
| 74  | 1177.98 |
| 75  | 1188.43 |
| 76  | 1208.83 |
| 77  | 1225.05 |
| 78  | 1250.23 |
| 79  | 1253.50 |
| 80  | 1268.49 |
| 81  | 1292.19 |
| 82  | 1312.83 |
| 83  | 1337.43 |
| 84  | 1348.25 |
| 85  | 1363.79 |
| 86  | 1373.51 |
| 87  | 1402.05 |
| 88  | 1404.48 |
| 89  | 1417.18 |
| 90  | 1430.27 |
| 91  | 1440.05 |
| 92  | 1444.35 |
| 93  | 1454.13 |
| 94  | 1455.75 |
| 95  | 1464.37 |
| 96  | 1464.84 |
| 97  | 1483.33 |
| 98  | 1491.50 |
| 99  | 1506.02 |
| 100 | 1511.72 |
| 101 | 1518.69 |
| 102 | 1523.17 |
| 103 | 1523.47 |
| 104 | 1525.76 |
| 105 | 1532.06 |
| 106 | 1532.90 |
| 107 | 1542.31 |
| 108 | 1543.66 |
| 109 | 1565.57 |
| 110 | 1684.06 |
| 111 | 1694.19 |
| 112 | 1744.91 |
| 113 | 1746.63 |
| 114 | 1797.20 |
| 115 | 1801.33 |
| 116 | 1850.62 |

|     |         |
|-----|---------|
| 17  | 3094.08 |
| 118 | 3101.45 |
| 119 | 3133.79 |
| 120 | 3118.79 |
| 121 | 3134.18 |

---

### Isovalerylshikonin Neutral

| Atom Number | Symbol | NA | Bond      | NB | Angle      | NC | Dihedral    |
|-------------|--------|----|-----------|----|------------|----|-------------|
| 1           | C      |    |           |    |            |    |             |
| 2           | C      | 1  | 1.4652784 |    |            |    |             |
| 3           | C      | 2  | 1.4572867 | 1  | 118.507417 |    |             |
| 4           | C      | 3  | 1.4163082 | 2  | 119.61078  | 1  | 0.6787348   |
| 5           | C      | 4  | 1.457736  | 3  | 120.164776 | 2  | -0.2232668  |
| 6           | C      | 1  | 1.3309896 | 2  | 122.712828 | 3  | -0.1849216  |
| 7           | H      | 1  | 1.0761125 | 6  | 121.632449 | 5  | 179.28567   |
| 8           | C      | 3  | 1.3853866 | 2  | 120.324953 | 1  | -179.487041 |
| 9           | C      | 4  | 1.3872118 | 3  | 119.788748 | 2  | 179.840478  |
| 10          | C      | 9  | 1.4052563 | 4  | 119.312593 | 3  | 0.1960729   |
| 11          | C      | 10 | 1.3619682 | 9  | 120.825548 | 4  | -0.2000874  |
| 12          | H      | 10 | 1.0760427 | 9  | 118.463533 | 4  | 179.84993   |
| 13          | H      | 11 | 1.0761    | 10 | 120.719867 | 9  | -179.954599 |
| 14          | C      | 6  | 1.504473  | 1  | 123.453162 | 2  | 178.573538  |
| 15          | H      | 14 | 1.0816116 | 6  | 108.732196 | 1  | 139.2833    |
| 16          | C      | 14 | 1.528168  | 6  | 111.756043 | 1  | -99.3366525 |
| 17          | H      | 16 | 1.0836911 | 14 | 108.443439 | 6  | 65.4996837  |
| 18          | H      | 16 | 1.0873075 | 14 | 107.14971  | 6  | -49.7938163 |
| 19          | C      | 16 | 1.4970832 | 14 | 112.149338 | 6  | -169.576774 |
| 20          | H      | 19 | 1.0820952 | 16 | 114.282307 | 14 | 58.1637912  |
| 21          | C      | 19 | 1.3297276 | 16 | 128.195163 | 14 | -122.596598 |
| 22          | C      | 21 | 1.5008919 | 19 | 120.653126 | 16 | -179.04489  |
| 23          | H      | 22 | 1.0888477 | 21 | 110.640657 | 19 | -121.135662 |
| 24          | H      | 22 | 1.0848868 | 21 | 111.914187 | 19 | -0.0950505  |
| 25          | H      | 22 | 1.0889228 | 21 | 110.742611 | 19 | 120.886703  |
| 26          | C      | 21 | 1.499212  | 19 | 125.166402 | 16 | 0.5914271   |
| 27          | H      | 26 | 1.0823648 | 21 | 113.569193 | 19 | 2.4403669   |
| 28          | H      | 26 | 1.0885763 | 21 | 110.11354  | 19 | 123.905343  |
| 29          | H      | 26 | 1.0889737 | 21 | 110.125331 | 19 | -118.90156  |
| 30          | O      | 14 | 1.4266455 | 6  | 110.492536 | 1  | 19.758916   |
| 31          | O      | 9  | 1.3321762 | 4  | 123.394473 | 3  | -179.859952 |
| 32          | H      | 31 | 0.968822  | 9  | 108.063411 | 4  | 0.4485945   |
| 33          | O      | 8  | 1.3325405 | 3  | 123.163462 | 2  | -0.023082   |
| 34          | H      | 33 | 0.9695379 | 8  | 107.951857 | 3  | -0.0862368  |
| 35          | O      | 5  | 1.2233497 | 4  | 121.605289 | 3  | 179.054723  |
| 36          | O      | 2  | 1.2248989 | 1  | 119.657708 | 6  | -179.889137 |
| 37          | C      | 30 | 1.336096  | 14 | 118.592336 | 6  | 85.371425   |
| 38          | C      | 37 | 1.4997473 | 30 | 111.495933 | 14 | -178.319476 |
| 39          | H      | 38 | 1.0856507 | 37 | 109.013829 | 30 | -26.6205236 |
| 40          | H      | 38 | 1.0900631 | 37 | 105.387793 | 30 | 87.5545721  |

|    |   |    |           |    |            |    |             |
|----|---|----|-----------|----|------------|----|-------------|
| 41 | C | 38 | 1.5259496 | 37 | 114.253987 | 30 | -151.479515 |
| 42 | H | 41 | 1.0873548 | 38 | 107.845017 | 37 | -51.3997883 |
| 43 | C | 41 | 1.5238813 | 38 | 111.306663 | 37 | 67.4124271  |
| 44 | H | 43 | 1.0866712 | 41 | 111.807376 | 38 | -58.0332099 |
| 45 | H | 43 | 1.0885274 | 41 | 110.718964 | 38 | 62.3461448  |
| 46 | H | 43 | 1.086878  | 41 | 110.80686  | 38 | -178.123846 |
| 47 | C | 41 | 1.52315   | 38 | 109.90305  | 37 | -169.291138 |
| 48 | H | 47 | 1.0867453 | 41 | 110.81167  | 38 | 179.483767  |
| 49 | H | 47 | 1.0884609 | 41 | 110.954558 | 38 | -60.86556   |
| 50 | H | 47 | 1.087215  | 41 | 111.360472 | 38 | 59.2825398  |
| 51 | O | 37 | 1.1977173 | 30 | 122.930887 | 14 | -0.1926816  |

List of calculated harmonic frequencies for each vibrational normal mode

| Mode | Frequency / cm <sup>-1</sup> |
|------|------------------------------|
| 1    | 16.43                        |
| 2    | 26.57                        |
| 3    | 29.66                        |
| 4    | 31.94                        |
| 5    | 37.43                        |
| 6    | 45.57                        |
| 7    | 52.20                        |
| 8    | 78.55                        |
| 9    | 92.74                        |
| 10   | 111.87                       |
| 11   | 129.13                       |
| 12   | 136.43                       |
| 13   | 151.15                       |
| 14   | 164.84                       |
| 15   | 171.11                       |
| 16   | 185.53                       |
| 17   | 202.79                       |
| 18   | 214.82                       |
| 19   | 227.05                       |
| 20   | 236.77                       |
| 21   | 244.91                       |
| 22   | 266.27                       |
| 23   | 306.96                       |
| 24   | 312.56                       |
| 25   | 331.35                       |
| 26   | 341.50                       |
| 27   | 377.00                       |



|    |         |
|----|---------|
| 28 | 380.21  |
| 29 | 386.82  |
| 30 | 393.93  |
| 31 | 414.01  |
| 32 | 437.53  |
| 33 | 440.65  |
| 34 | 444.91  |
| 35 | 466.49  |
| 36 | 477.19  |
| 37 | 488.08  |
| 38 | 501.33  |
| 39 | 509.75  |
| 40 | 512.74  |
| 41 | 555.45  |
| 42 | 570.84  |
| 43 | 616.30  |
| 44 | 623.72  |
| 45 | 664.04  |
| 46 | 719.55  |
| 47 | 727.11  |
| 48 | 739.41  |
| 49 | 743.36  |
| 50 | 745.28  |
| 51 | 767.19  |
| 52 | 776.88  |
| 53 | 812.17  |
| 54 | 823.96  |
| 55 | 841.02  |
| 56 | 865.09  |
| 57 | 884.03  |
| 58 | 897.77  |
| 59 | 925.85  |
| 60 | 934.48  |
| 61 | 954.92  |
| 62 | 961.97  |
| 63 | 979.55  |
| 64 | 986.67  |
| 65 | 996.97  |
| 66 | 997.45  |
| 67 | 1004.77 |
| 68 | 1027.59 |
| 69 | 1039.17 |
| 70 | 1043.78 |

|     |         |
|-----|---------|
| 71  | 1051.81 |
| 72  | 1081.40 |
| 73  | 1110.36 |
| 74  | 1122.36 |
| 75  | 1144.07 |
| 76  | 1167.67 |
| 77  | 1169.32 |
| 78  | 1181.42 |
| 79  | 1188.47 |
| 80  | 1209.70 |
| 81  | 1228.47 |
| 82  | 1249.26 |
| 83  | 1252.91 |
| 84  | 1259.09 |
| 85  | 1291.86 |
| 86  | 1302.47 |
| 87  | 1312.35 |
| 88  | 1337.60 |
| 89  | 1350.14 |
| 90  | 1362.21 |
| 91  | 1373.86 |
| 92  | 1401.91 |
| 93  | 1404.17 |
| 94  | 1410.07 |
| 95  | 1417.36 |
| 96  | 1434.92 |
| 97  | 1443.41 |
| 98  | 1448.08 |
| 99  | 1456.43 |
| 100 | 1457.65 |
| 101 | 1461.67 |
| 102 | 1464.71 |
| 103 | 1483.60 |
| 104 | 1490.69 |
| 105 | 1496.69 |
| 106 | 1504.91 |
| 107 | 1513.09 |
| 108 | 1519.22 |
| 109 | 1522.99 |
| 110 | 1524.17 |
| 111 | 1525.77 |
| 112 | 1531.26 |
| 113 | 1532.69 |

|     |         |
|-----|---------|
| 114 | 1540.07 |
| 115 | 1542.79 |
| 116 | 1565.13 |
| 17  | 1683.99 |
| 118 | 1693.86 |
| 119 | 1744.22 |
| 120 | 1747.04 |
| 121 | 1796.74 |
| 122 | 1802.13 |
| 123 | 1850.08 |
| 124 | 3094.46 |
| 125 | 3096.41 |
| 126 | 3100.88 |
| 127 | 3101.21 |
| 128 | 3114.92 |
| 129 | 3122.20 |
| 130 | 3134.97 |
| 131 | 3140.99 |
| 132 | 3143.79 |
| 133 | 3158.25 |
| 134 | 3163.68 |
| 135 | 3169.39 |
| 136 | 3171.31 |
| 137 | 3175.66 |
| 138 | 3185.33 |
| 139 | 3189.25 |
| 140 | 3204.61 |
| 141 | 3208.71 |
| 142 | 3215.37 |
| 143 | 3286.71 |
| 144 | 3293.11 |
| 145 | 3299.31 |
| 146 | 3612.69 |
| 147 | 3627.24 |

---

### 1,4-naphthoquinone Neutral

| Atom Number | Symbol | NA | Bond      | NB | Angle      | NC | Dihedral    |
|-------------|--------|----|-----------|----|------------|----|-------------|
| 1           | C      |    |           |    |            |    |             |
| 2           | C      | 1  | 1.327305  |    |            |    |             |
| 3           | C      | 1  | 1.475517  | 2  | 122.085118 |    |             |
| 4           | C      | 2  | 1.4755175 | 1  | 122.085064 | 3  | -0.000973   |
| 5           | C      | 4  | 1.4834179 | 2  | 117.577367 | 1  | 0.0004569   |
| 6           | C      | 5  | 1.396302  | 4  | 120.337566 | 2  | -0.0004651  |
| 7           | C      | 6  | 1.3864005 | 5  | 119.843295 | 4  | -180        |
| 8           | C      | 7  | 1.3834128 | 6  | 120.015682 | 5  | 0           |
| 9           | C      | 8  | 1.386821  | 7  | 120.141064 | 6  | 0           |
| 10          | C      | 9  | 1.3834128 | 8  | 120.141064 | 7  | 0           |
| 11          | H      | 8  | 1.0763183 | 7  | 119.84616  | 6  | -180        |
| 12          | H      | 9  | 1.0763188 | 8  | 120.012822 | 7  | -180        |
| 13          | O      | 4  | 1.207859  | 2  | 120.332603 | 1  | -180        |
| 14          | O      | 3  | 1.2078589 | 1  | 120.332617 | 2  | -179.999354 |
| 15          | H      | 1  | 1.0769421 | 2  | 121.870479 | 4  | 179.999557  |
| 16          | H      | 2  | 1.0769415 | 1  | 121.87052  | 3  | 179.999576  |
| 17          | H      | 7  | 1.075406  | 6  | 119.336678 | 5  | -180        |
| 18          | H      | 10 | 1.075406  | 9  | 120.647694 | 8  | 180         |

List of calculated harmonic frequencies for each vibrational normal mode

| Mode | Frequency / cm <sup>-1</sup> |
|------|------------------------------|
| 1    | 82.56                        |
| 2    | 119.92                       |
| 3    | 198.19                       |
| 4    | 267.24                       |
| 5    | 278.66                       |
| 6    | 389.73                       |
| 7    | 436.26                       |
| 8    | 465.92                       |
| 9    | 471.15                       |
| 10   | 486.85                       |
| 11   | 574.88                       |
| 12   | 625.97                       |
| 13   | 638.97                       |
| 14   | 716.96                       |
| 15   | 727.96                       |
| 16   | 793.11                       |
| 17   | 812.64                       |

|    |         |
|----|---------|
| 18 | 82270   |
| 19 | 829.20  |
| 20 | 912.06  |
| 21 | 956.69  |
| 22 | 1050.98 |
| 23 | 1059.70 |
| 24 | 1071.33 |
| 25 | 1075.49 |
| 26 | 1109.09 |
| 27 | 1118.01 |
| 28 | 1170.92 |
| 29 | 1202.92 |
| 30 | 1216.90 |
| 31 | 1294.63 |
| 32 | 1352.86 |
| 33 | 1360.94 |
| 34 | 1389.16 |
| 35 | 1449.58 |
| 36 | 1541.90 |
| 37 | 1567.91 |
| 38 | 1687.93 |
| 39 | 1704.12 |
| 40 | 1747.76 |
| 41 | 1812.23 |
| 42 | 1827.24 |
| 43 | 3276.12 |
| 44 | 3277.28 |
| 45 | 3287.86 |
| 46 | 3293.37 |
| 47 | 3298.55 |
| 48 | 3301.95 |

---

### 5,8-dihydroxy-1,4-naphthoquinone Neutral

| Atom Number | Symbol | NA | Bond      | NB | Angle      | NC | Dihedral    |
|-------------|--------|----|-----------|----|------------|----|-------------|
| 1           | C      |    |           |    |            |    |             |
| 2           | C      | 1  | 1.328097  |    |            |    |             |
| 3           | C      | 1  | 1.4694498 | 2  | 121.785951 |    |             |
| 4           | C      | 2  | 1.469448  | 1  | 121.786051 | 3  | -0.0250039  |
| 5           | C      | 4  | 1.4593348 | 2  | 118.238176 | 1  | 0.0049798   |
| 6           | C      | 5  | 1.417888  | 4  | 119.975811 | 2  | 0.0050754   |
| 7           | C      | 6  | 1.3863903 | 5  | 119.882606 | 4  | -179.996401 |
| 8           | C      | 7  | 1.4048997 | 6  | 119.354494 | 5  | 0           |
| 9           | C      | 8  | 1.36218   | 7  | 120.762896 | 6  | -0.0026181  |
| 10          | C      | 5  | 1.3863906 | 4  | 120.14156  | 2  | -179.993219 |
| 11          | H      | 8  | 1.0760123 | 7  | 118.551352 | 6  | -179.998119 |
| 12          | H      | 9  | 1.076013  | 8  | 120.685748 | 7  | -179.99951  |
| 13          | O      | 4  | 1.2237753 | 2  | 119.808163 | 1  | 179.974855  |
| 14          | O      | 3  | 1.2237758 | 1  | 119.808083 | 2  | 179.938167  |
| 15          | O      | 10 | 1.3326093 | 5  | 123.189844 | 4  | 0.0047541   |
| 16          | H      | 15 | 0.9692063 | 10 | 108.006865 | 5  | 0.0071848   |
| 17          | O      | 7  | 1.3326084 | 6  | 123.189746 | 5  | -179.988703 |
| 18          | H      | 17 | 0.9692081 | 7  | 108.006866 | 6  | 0.0118939   |
| 19          | H      | 1  | 1.0765152 | 2  | 121.983948 | 4  | 179.984321  |
| 20          | H      | 2  | 1.0765153 | 1  | 121.983841 | 3  | 179.983051  |

List of calculated harmonic frequencies for each vibrational normal mode

| Mode | Frequency / cm <sup>-1</sup> |
|------|------------------------------|
| 1    | 103.30                       |
| 2    | 109.69                       |
| 3    | 171.93                       |
| 4    | 197.26                       |
| 5    | 279.46                       |
| 6    | 298.04                       |
| 7    | 369.65                       |
| 8    | 379.32                       |
| 9    | 418.87                       |
| 10   | 442.04                       |
| 11   | 461.89                       |
| 12   | 470.15                       |
| 13   | 488.47                       |
| 14   | 516.21                       |
| 15   | 574.12                       |

|    |         |
|----|---------|
| 16 | 642.20  |
| 17 | 671.13  |
| 18 | 671.33  |
| 19 | 707.12  |
| 20 | 736.92  |
| 21 | 740.99  |
| 22 | 764.82  |
| 23 | 779.97  |
| 24 | 796.72  |
| 25 | 895.06  |
| 26 | 908.40  |
| 27 | 990.76  |
| 28 | 998.38  |
| 29 | 1035.97 |
| 30 | 1060.16 |
| 31 | 1151.23 |
| 32 | 1155.21 |
| 33 | 1199.09 |
| 34 | 1271.12 |
| 35 | 1297.37 |
| 36 | 1341.42 |
| 37 | 1396.05 |
| 38 | 1412.90 |
| 39 | 1424.91 |
| 40 | 1469.84 |
| 41 | 1481.06 |
| 42 | 1543.43 |
| 43 | 1565.14 |
| 44 | 1684.25 |
| 45 | 1695.21 |
| 46 | 1732.14 |
| 47 | 1753.25 |
| 48 | 1798.31 |
| 49 | 3284.20 |
| 50 | 3286.62 |
| 51 | 3299.21 |
| 52 | 3299.46 |
| 53 | 3618.05 |
| 54 | 3618.68 |

---
